# Supplementary material
Source: MDPI journal article supplement (https://www.mdpi.com/2073-4344/12/12/1585)
Supplement: s1 [file s1]

## Supporting Information

### Heterostructured Photocatalysts Associating ZnO Nanorods and Ag-In-Zn-S Quantum Dots for the Visible Light-Driven Photocatalytic Degradation of the Acid Orange 7 Dye

Maroua Mrad <sup>1,2</sup>, Bilel Chouchene <sup>1</sup>, Tahar Ben Chaabane <sup>2</sup>, Thomas Gries <sup>3</sup>, Ghouti Medjahdi <sup>3</sup>, Lavinia Balan <sup>4</sup>, Raphaël Schneider <sup>1,\*</sup>

<sup>1</sup> Université Lorraine, CNRS, LRGP, F-54000 Nancy, France

<sup>2</sup> Université de Carthage, Faculté des Sciences de Bizerte, LR 18 ES11 Laboratoire des composés hétéro-organiques et des matériaux nanostructurés, 7021 Jarzouna, Bizerte, Tunisia

<sup>3</sup> Université Lorraine, CNRS, IJL, F-54000 Nancy, France

<sup>4</sup> CEMHTI-UPR 3079 CNRS, Site Haute Température, 1D avenue de la Recherche Scientifique, 45071 Orléans, France

\* Correspondence: raphael.schneider@univ-lorraine.fr; Tel.: +33 3 72 74 37 90

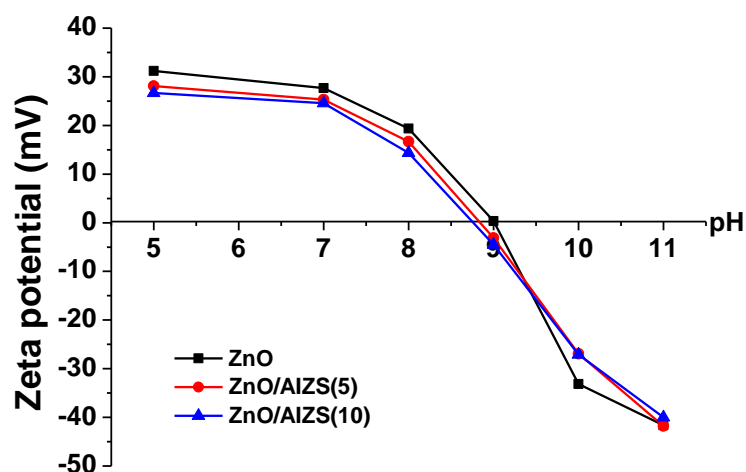

**Figure S1.** Zeta potentials of ZnO NRs, ZnO/AIZS(5) and ZnO/AIZS(10) heterostructured photocatalysts as a function of pH

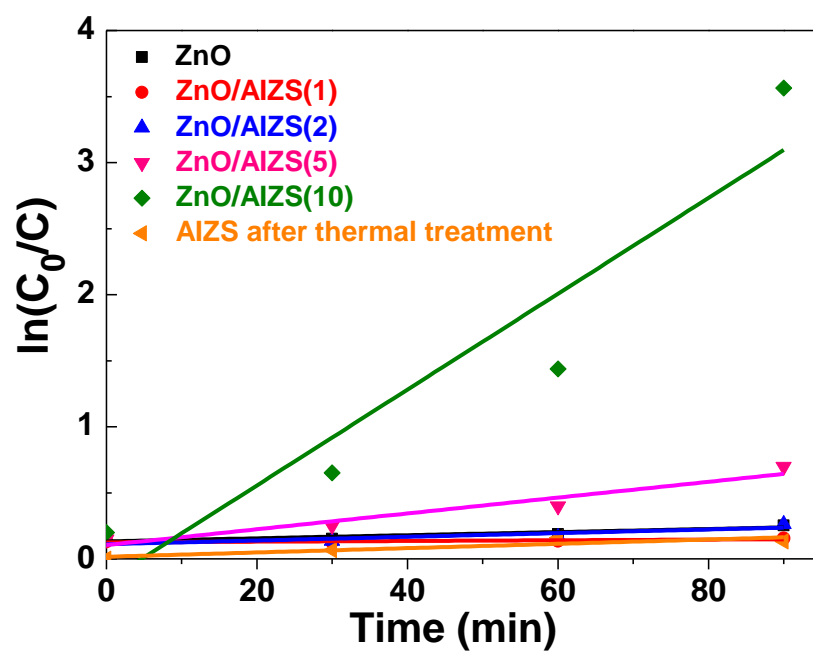

**Figure S2.** Plots of  $\ln(C_0/C)$  for the determination of the first-order rate constants  $k$  of the photodegradation of Orange II under visible light irradiation.

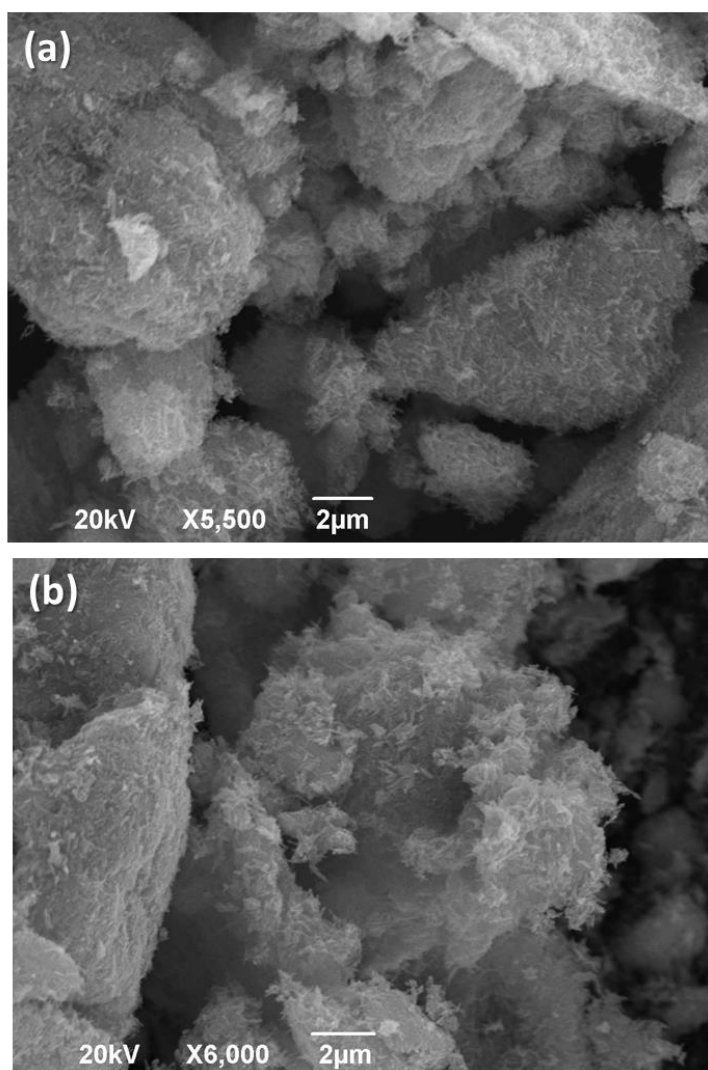

**Figure S3.** SEM images of (a) the as-prepared and (b) the reused ZnO/AIZS(10) photocatalyst.

**Table S1.** Impedance parameters obtained after fitting the EIS curves with the Randles equivalent model, where  $n$  is the exponent of the constant phase element  $Q$  and  $\sigma$  is the Warburg coefficient.

| Sample | $R_s$ ( $\Omega$ ) | CPE ( $\mu F.s^{n-1}$ ) | $n$   | $R_{ct}$ ( $\Omega$ ) | $\sigma$ ( $\Omega.s^{-1/2}$ ) |
|--------|--------------------|-------------------------|-------|-----------------------|--------------------------------|
| ZnO    | 54.19              | 29.08                   | 0.599 | 167022                | -6694                          |
| 1%     | 50.87              | 27.71                   | 0.582 | 177183                | -8424                          |
| 2%     | 56.34              | 28.4                    | 0.604 | 165075                | -6073                          |
| 5%     | 79.4               | 25.82                   | 0.7   | 33600                 | 120,8                          |
| 10 %   | 81.62              | 38.26                   | 0.767 | 14659                 | 268,1                          |
